# Supplementary material
Source: MDPI journal article supplement (https://www.mdpi.com/2227-9040/9/5/110)
Supplement: s1 [file s1 › chemosensors-1203241-supplementary.pdf]

## Supplementary Materials

### Preparation of electropolymerized films for electronic tongue

The peaks (labelled A, C respectively) observed in CV voltammograms confirmed the redox processes occurring during formation of the electropolymerized films onto electrode surface. At the end of electrochemical oxidation, the electrode surfaces had a characteristic colouring.

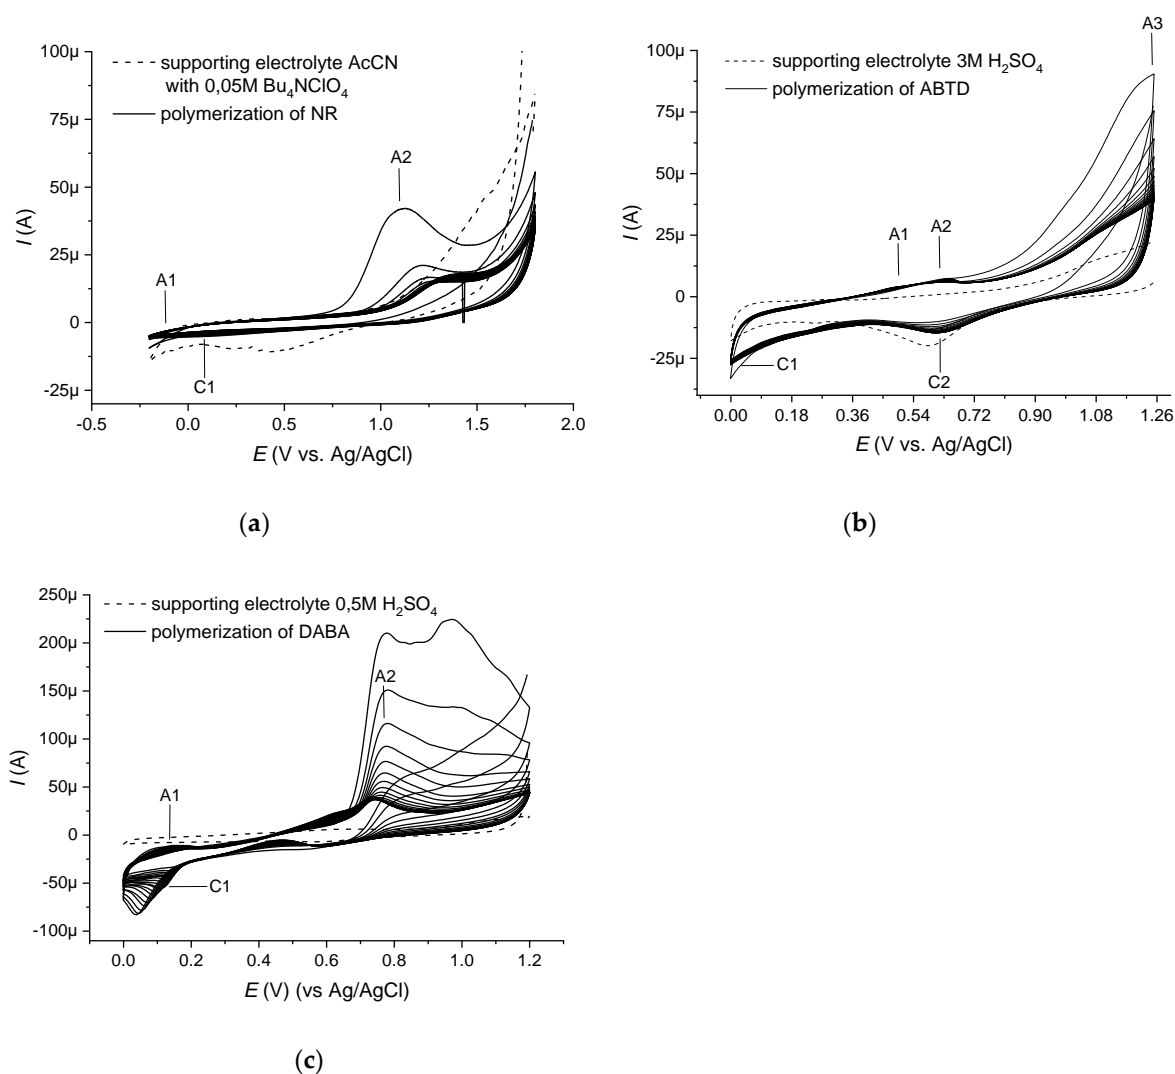

**Figure S1.** Cyclic voltammograms of polymerization of monomers; a) NR, b) ABTD and c) DABA. The individual figures include curves of supporting electrolytes (dashed line). The detailed conditions of polymerization process are summarized in the Table 1.

### The structure of Pt substrates

The structure of Pt substrates was studied with a JSM 6400 scanning electron microscope (JEOL, JAPAN) and with an optical Leica microscope (Germany).

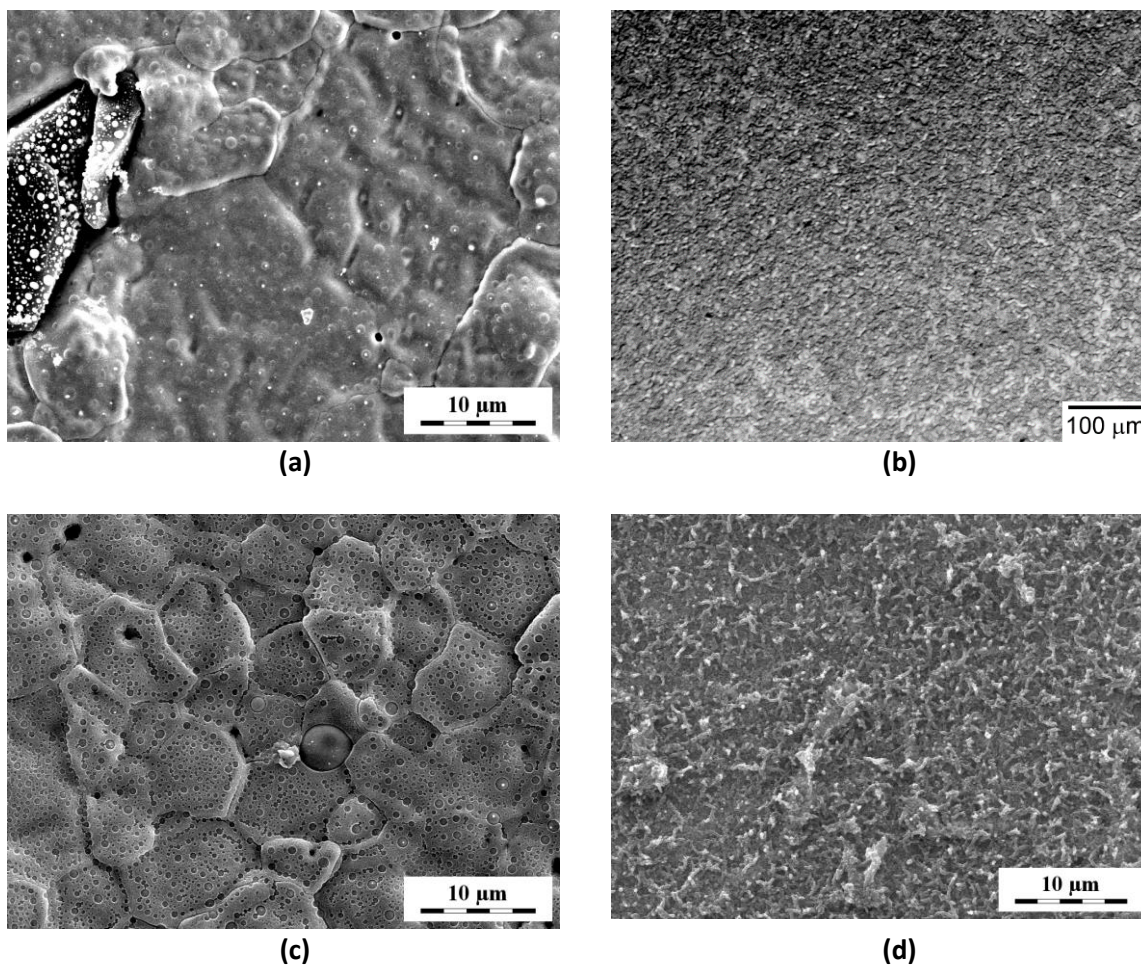

**Figure S2.** SEM (a, c, d) and optical microscopy images of (b) of different unmodified and modified relatively homogenous Pt surfaces: (a) Pt (bare electrode as inhomogeneous surface with visible defects (grooves)), (b) PABTD on Pt, (c) PNR on Pt and (d) PDABA on Pt substrate.

The real samples of effervescent tablets contain, in addition to vitamin C, a number of other substances such as citric acid, cations, sugars and fillers which are summarized in Table S1.

**Table S1.** Composition of effervescent tablets (labeled S\_A – S\_E)

| Tablet | Producer/<br>Manufacturer | Substances present in the tablet declared by the manufacturer on the<br>packaging                                                                                                                                                                                                                                                                                                                                                                                               |
|--------|---------------------------|---------------------------------------------------------------------------------------------------------------------------------------------------------------------------------------------------------------------------------------------------------------------------------------------------------------------------------------------------------------------------------------------------------------------------------------------------------------------------------|
| S_A    | Haas                      | Citric acid, sugar, acidity regulator (sodium carbonates), natural aroma (citric), <b>L-ascorbic acid</b> , sweetener (aspartame), colorant (riboflavin)                                                                                                                                                                                                                                                                                                                        |
| S_B    | Haas                      | Citric acid, sugar, acidity regulator (sodium carbonates), aromas (orange, mandarin), <b>L-ascorbic acid</b> , sweetener (aspartame), natural dye (betanin), DL-alpha-tocopheryl acetate, nicotinamide, Calcium D-pantothenate, riboflavin-5-phosphate sodium, pyridoxine hydrochloride, thiamine mononitrate, cyanocobalamin                                                                                                                                                   |
| S_C    | Haas                      | Citric acid, acidity regulator (sodium bicarbonate), sugar, calcium carbonate, colorant (betanin), vitamins ( <b>L-ascorbic acid</b> , DL-alpha-tocopheryl acetate, D-biotin, nicotinamide, Calcium D-pantothenate, pyridoxine hydrochloride, riboflavin-5-phosphate sodium, thiamine mononitrate, pteroylmonoglutamic acid), flavor, sweetener (aspartame)                                                                                                                     |
| S_D    | MaxiVita                  | Citric acid, acidity regulator - sodium bicarbonate, sweetener - sorbitol, vitamin premix and active ingredients (guarana extract, <b>L-ascorbic acid</b> , D-biotin, DL-alpha-tocopheryl acetate, thiamine hydrochloride, riboflavin, pyridoxine hydrochloride, cyanocobalamin, nicotinamide, pantothenic acid, folic acid, aroma, anti-caking agent - polyethylene glycol (PEG 6000), guarana seed extract), sweeteners - aspartame and sodium saccharin, dye - beta-carotene |
| S_E    | MaxiVita                  | Sweetener - sorbitol, citric acid, acidity regulator - sodium bicarbonate, <b>L-ascorbic acid</b> , anti-caking agent - polyethylene glycol (PEG 6000), aroma, acerola extract, aroma, zinc citrate, sweeteners - aspartame and sodium saccharin, colorant - riboflavin                                                                                                                                                                                                         |

Coulometric titrations with iodine at a constant 10 mA generating current and at polarization voltage of 200 was used as a comparative method to determine the exact content of ascorbic acid in effervescent tablet samples S\_A – S\_E. First, the titrating agent iodine (I<sub>2</sub>) is formed, which is obtained by anodic oxidation from sodium iodide (NaI) as the basic electrolyte as follows:  $2I^- = I_2 + e^-$ . Iodine then reacts with AA to form dehydroascorbic acid and hydrogen iodide in a stoichiometric ratio of 1: 1 according to the equation:  $H_8C_6O_6 + I_2 = H_6C_6O_6 + 2HI$  [10]. A solution of oxalic acid maintains a low pH (around 4) and also has a weak complexing ability.

The titration record is shown in the figure S2. Coulometric measurements of effervescent tablets A – E showed that the samples contained ascorbic acid in the range of 39.7 – 263.0 mg with a percentage in the range of 0.99 – 8.36%. The measured and calculated average data for individual tablets are summarized in Table S2, The data are represented as follows: weights of individual tablets  $m_{weight}$ ,  $t_{BE}$  time at equivalence point (BE),  $Q_{BE} - \bar{Q}_{BI}$  representing the difference between the charge of the sample and the average charge of the blank in BE,  $m_{AA}$  in the sample is the mass of ascorbic acid in the sample and  $w_{AA}$  is the mass fraction of ascorbic acid in the sample.

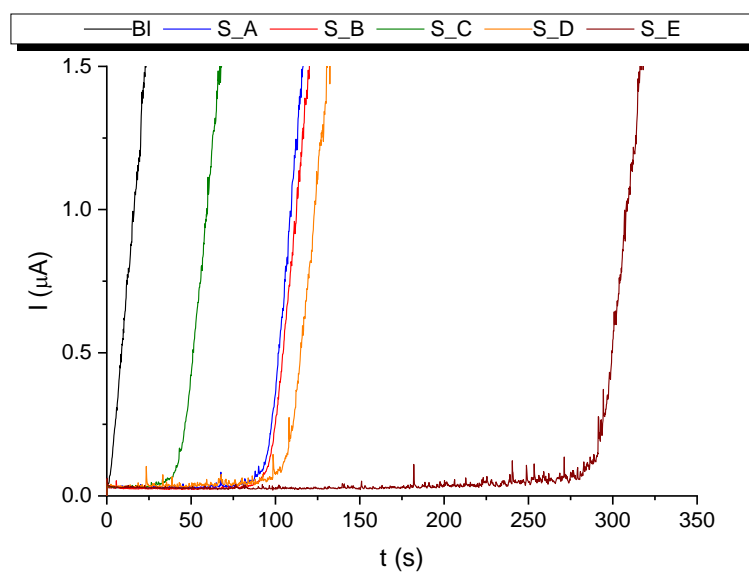

**Figure S3.** Dependence of the indication current on the time in the blank experiment (BI) and in the analysis of samples of effervescent tablets A – E (marked S\_A – S\_E).

**Table S2.** Measured and calculated data of coulometric titration of ascorbic acid (AA) in effervescent tablet samples (labeled S\_A – S\_E) for  $n = 6$ . The volume 1 ml was pipetted to the cell.

| Effervescent tablets | $m_{\text{weight}}$ [g] | $t_{BE}$ [s] | $Q_{BE} - \bar{Q}_{BI}$ [mC] | $m_{AA}$ in sample [g] | $w_{AA}$ |
|----------------------|-------------------------|--------------|------------------------------|------------------------|----------|
| S_A                  | 3.9970                  | 95.30        | 920.5                        | 0.0858                 | 0.0215   |
| S_B                  | 3.9548                  | 96.68        | 934.4                        | 0.0871                 | 0.0220   |
| S_C                  | 4.0054                  | 44.04        | 434.4                        | 0.0397                 | 0.0099   |
| S_D                  | 2.5566                  | 107.94       | 1065.2                       | 0.0972                 | 0.0380   |
| S_E                  | 3.1461                  | 291.96       | 2861.8                       | 0.2630                 | 0.0836   |

The highest content of ascorbic acid 8.4% was found in tablet E, on the contrary the lowest found content of 0.99% was in tablet C. The tablets differed in composition, color and appearance of the aqueous solution after dissolution.
